# Supplementary material for: Going beyond the Flood Insurance Rate Map: insights from flood hazard map co-production
Source: Copernicus journal article supplement (doi:10.5194/nhess-2017-384), 2017-11-03
Supplement: Supplementary file 1 [file nhess-2017-384-supplement.zip]

**Feedback on Scenarios:** What scenarios would be most useful for informing decisions about flood risk in the Tijuana River Valley?

**RID#:** \_\_\_\_\_ -

**1. What category best describes you? (check one)**

- ☐ City Planner
- ☐ Public Works
- ☐ Engineer
- ☐ Emergency Manager
- ☐ Emergency Responder
- ☐ Natural Resource Manager/ Land Manager
- ☐ NGO
- ☐ Community Member
- ☐ Other (please specify):

**2. What planning time frame do you most often work with? (check one)**

- ☐ 15 year planning cycle
- ☐ 30 year planning cycle
- ☐ 50 year planning cycle
- ☐ 75 year planning cycle
- ☐ 100 year planning cycle
- ☐ N/A or No Opinion
- ☐ Other (please specify)

**3. *Return Period:*** The frequency of an event, or how often the event is expected to occur. The return period is typically presented in years. For example, a return period of 1 means the event is expected every year, whereas a return period of 100 means the event is expected once every 100 hundred years.

**What return period is most useful to be mapped? (Check one)**

- ☐ 1 year
- ☐ 5 year
- ☐ 10 year
- ☐ 20 year
- ☐ 30 year
- ☐ 50 year
- ☐ 75 year
- ☐ 100 year
- ☐ N/A or No Opinion
- ☐ Other (please specify):

4. **Flood Driver:** The physical process responsible for flooding. In the Tijuana River Valley, common flood drivers include riverine flow from the canyons or the Tijuana River, extreme high tides, and wave overtopping.

What flood driver is the most useful to be mapped? (Check one)

- ☐ Tijuana River
- ☐ Goat Canyon
- ☐ Smuggler's Gulch
- ☐ Coastal- Tide + Storm surge
- ☐ Coastal- Wave driven
- ☐ N/A or No Opinion
- ☐ Other (please specify)

5. **Management strategy:** Proposed alterations to existing infrastructure and/ or floodplain expected to change flood behavior. These include dredging channels, raising levees, removing levees, channelizing rivers, beach augmentations, raising sea walls, etc.

What management strategy or scenario is most useful to be mapped? (Check one)

- ☐ Dredged Tijuana River Channel
- ☐ Dredged Pilot Channel
- ☐ Dredged Smuggler's Gulch Channel
- ☐ Tijuana River Channel filled in with sediment (Sedimented channel)
- ☐ Add-in new berms in the TRV (specify where)
- ☐ Remove berms in the TRV (specify where)
- ☐ Elevation (Changing infrastructure elevations- roads...) (specify where)
- ☐ N/A or No Opinion
- ☐ A strategy being considered by your agency/ organization (please specify strategy, location, and agency):

6. What **conditions** do you most want to see? (check one)

- ☐ Current conditions (Current sea levels, development conditions...)
- ☐ Future conditions –Sea Level Rise
- ☐ Future conditions- Level of development in Tijuana
- ☐ Future conditions- Channelization of the river in Tijuana
- ☐ N/A or No Opinion
- ☐ Other (please specify)

7. Comments:
