# Supplementary material for: Going beyond the Flood Insurance Rate Map: insights from flood hazard map co-production
Source: Copernicus journal article supplement (doi:10.5194/nhess-2017-384), 2017-11-03
Supplement: Supplementary file 2 [file nhess-2017-384-supplement.zip]

Archive with 2 entries (2 files):
- FocusGroupFacilitationPlan.pdf
- scenario questionnaire.pdf
